# Supplementary material for: Arteriovenous metabolomics in pigs reveals CFTR regulation of metabolism in multiple organs
Source: PubMed Central journal article supplement (PMC11213515; doi:10.1172/jci174500), 2024-05-14
Supplement: jci-134-174500-s108.pdf [file jci-134-174500-s108.pdf]

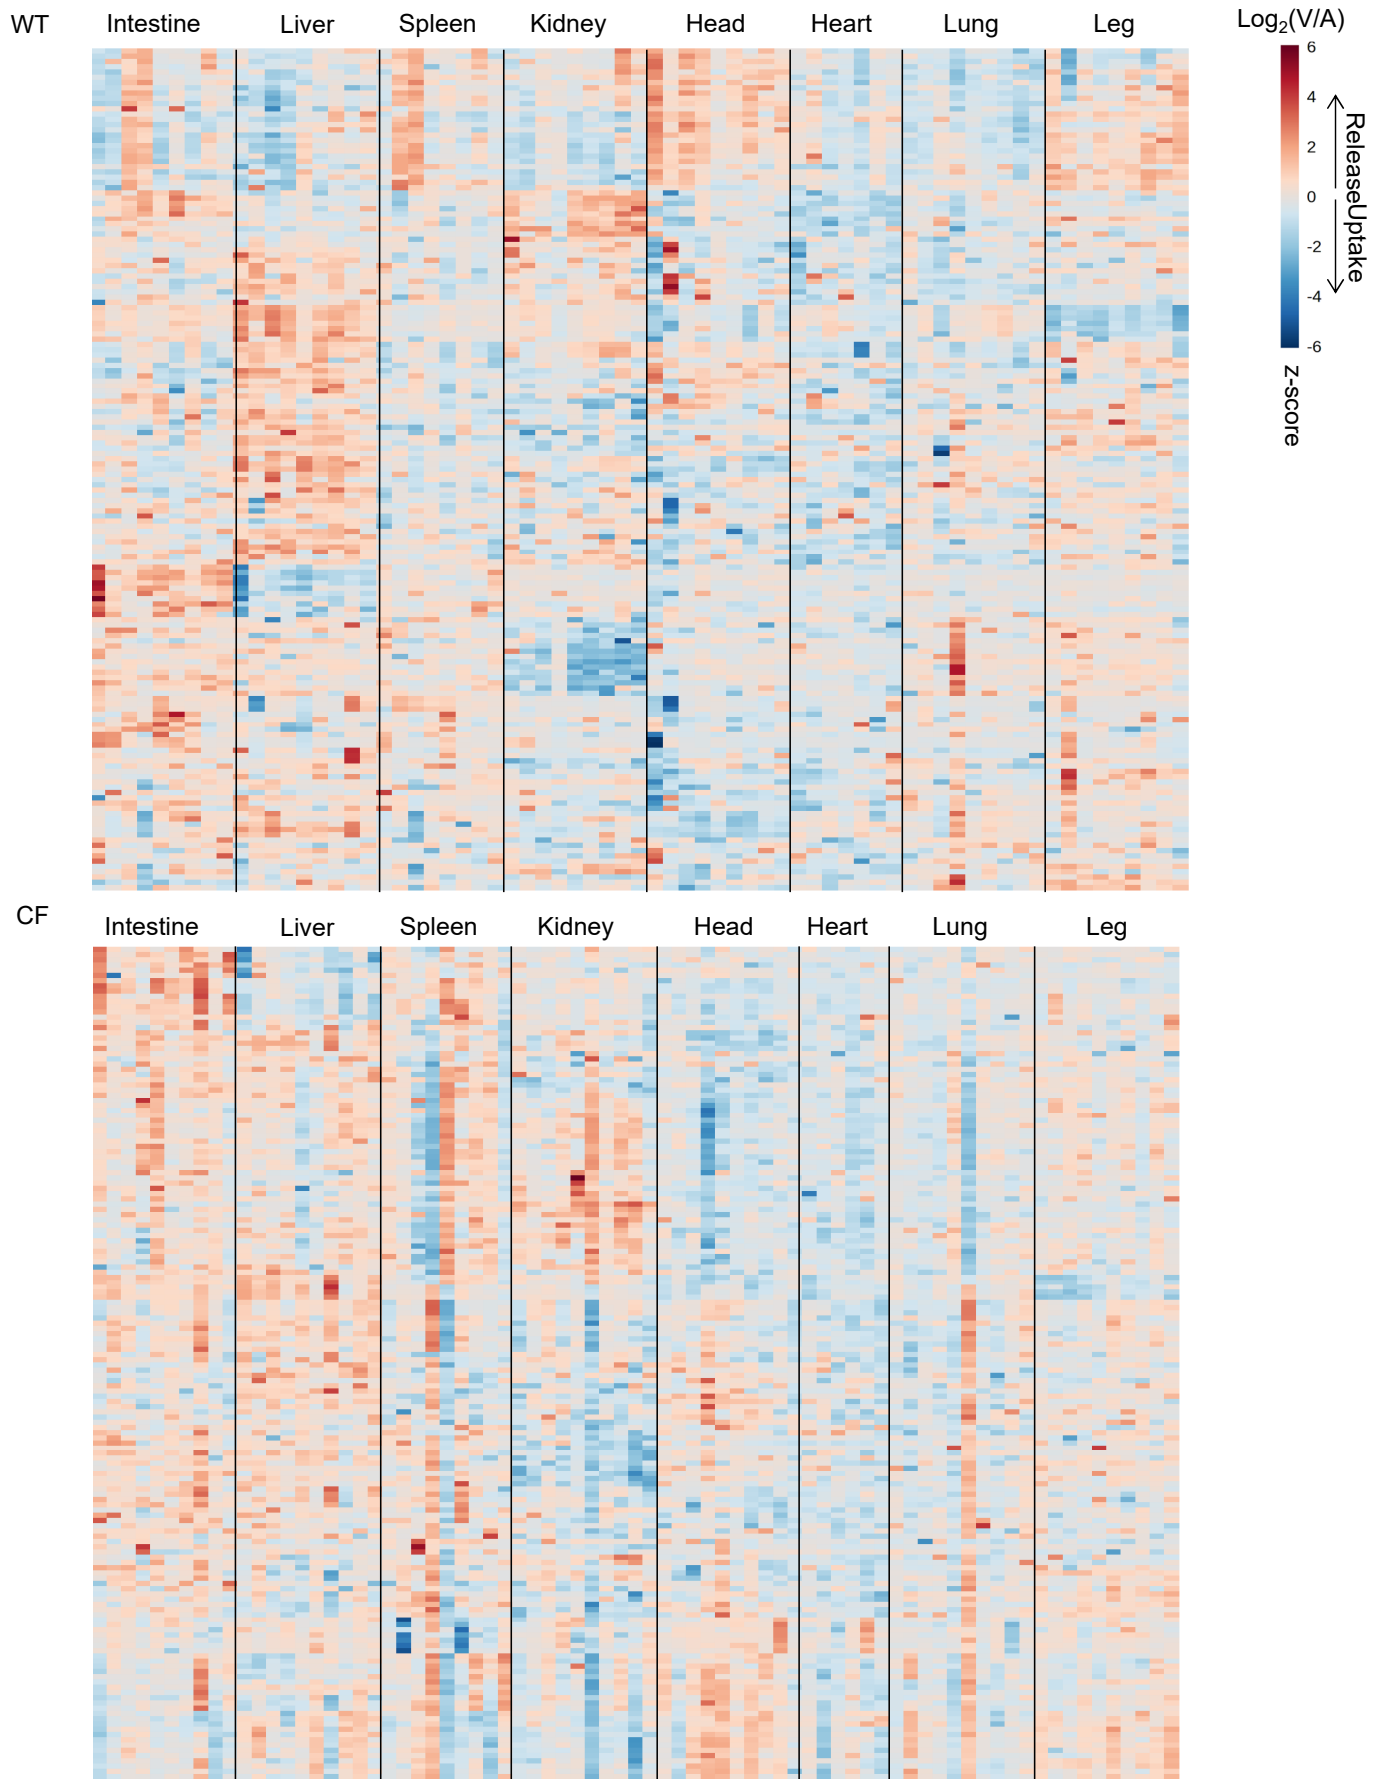

**Supplemental Figure 1. Heatmap of 161 circulating metabolites that showed significant trafficking related to Figure 2.** Heatmap of 161 circulating metabolites that showed significant trafficking at least in one organ, determined by  $FDR < 0.05$  by ANOVA. Each data point indicates a median of three technical replicates. Head and legs likely reflect metabolic activities of the brain and skeletal muscle respectively. N=9 WT and 10 CF pigs except for WT heart (N=7) and spleen (N=8), and CF heart (N=6) and spleen (N=9).

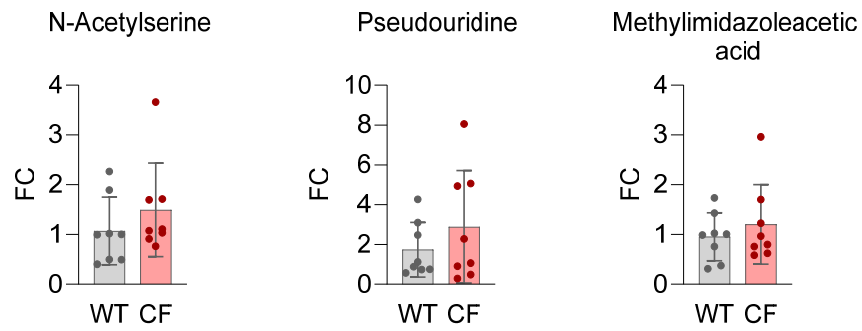

**Supplemental Figure 2. No change in eGFR indicators between WT and CF new born pigs, related to Figure 5**

Comparison of blood metabolite indicators that have a strong correlation with eGFR between 8 WT and CF littermates. Bars show mean  $\pm$  s.d

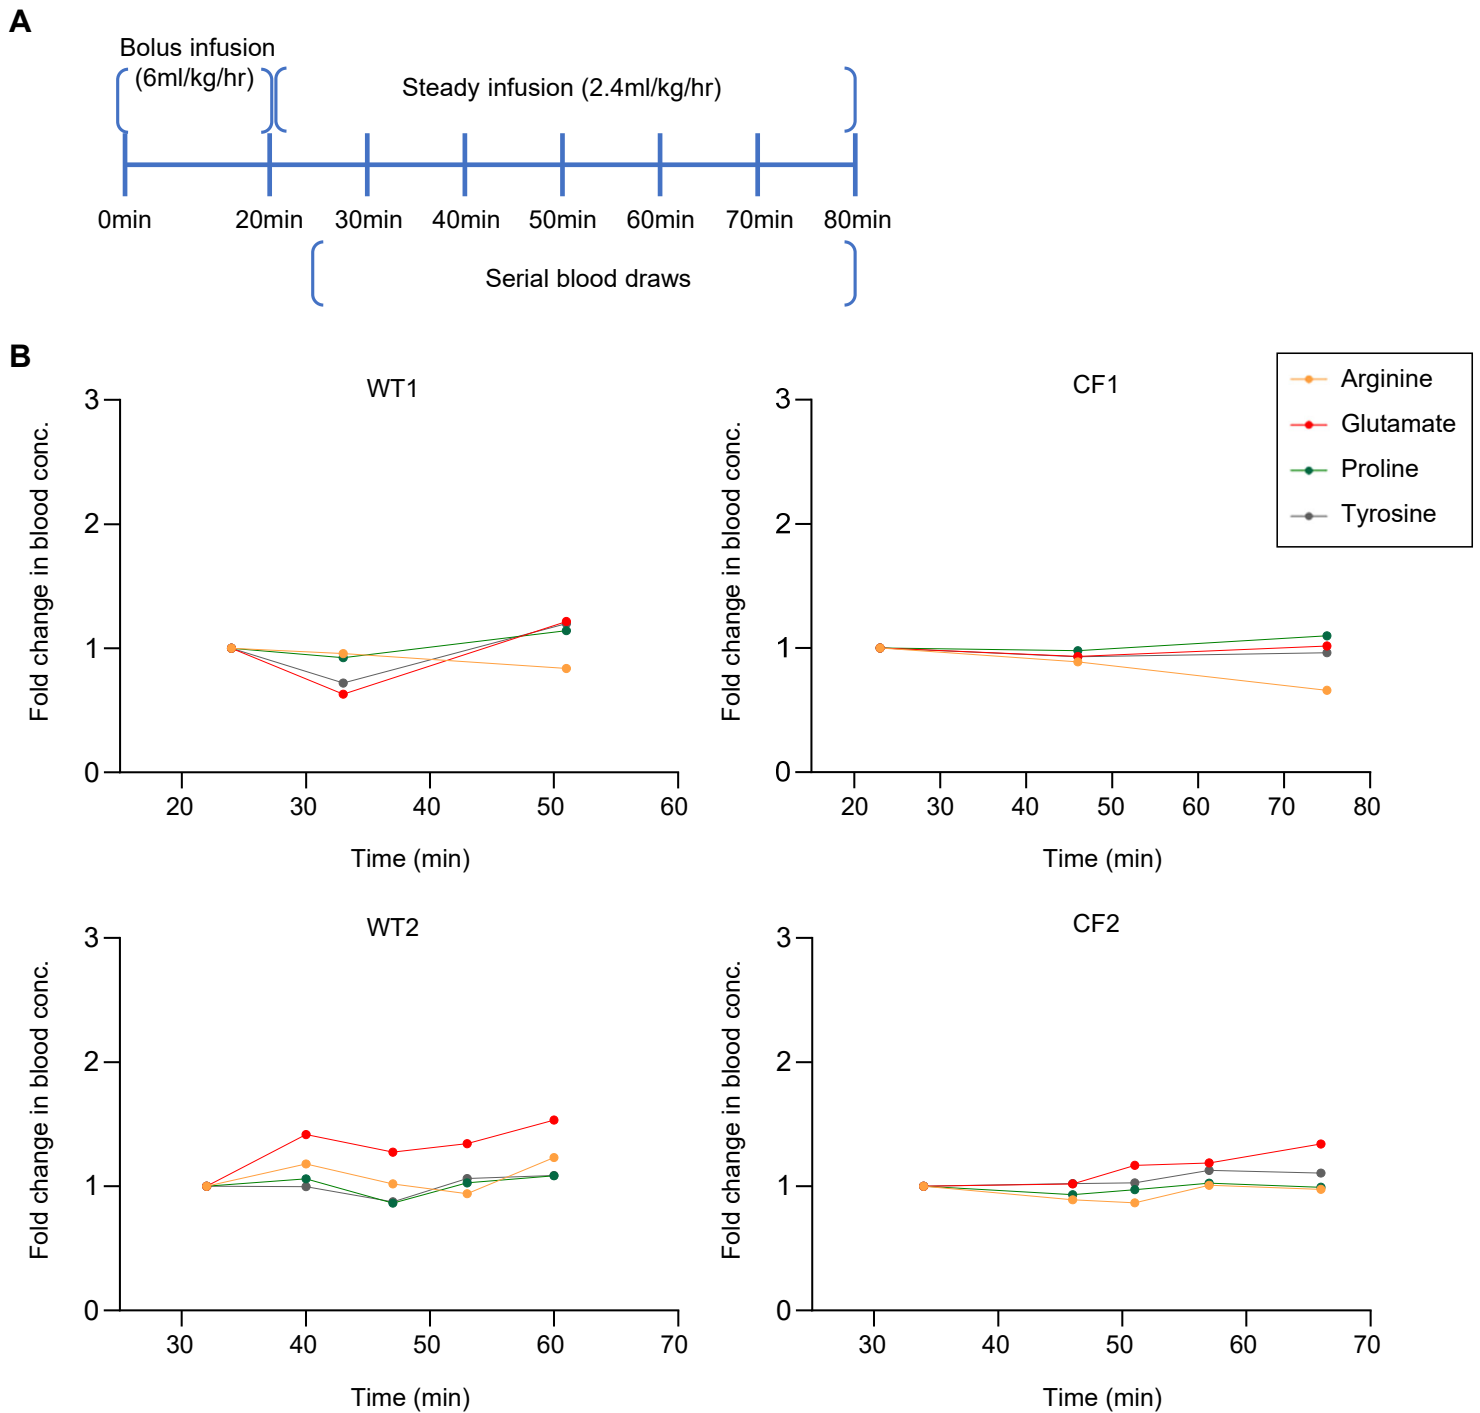

**Supplemental Figure 3. Stable isotope tracer infusions in pigs, related to Figure 5**

(A) Schematic of  $^{13}\text{C}$ -amino acid isotope tracer infusions. After a 20 min bolus infusion, pigs were infused at a steady rate, and arterial blood was drawn at serial intervals. (B) Time-course fold change in blood concentrations of the infused amino acids (sum of  $^{13}\text{C}$ -labeled and unlabeled forms) relative to the first draw for each pig.

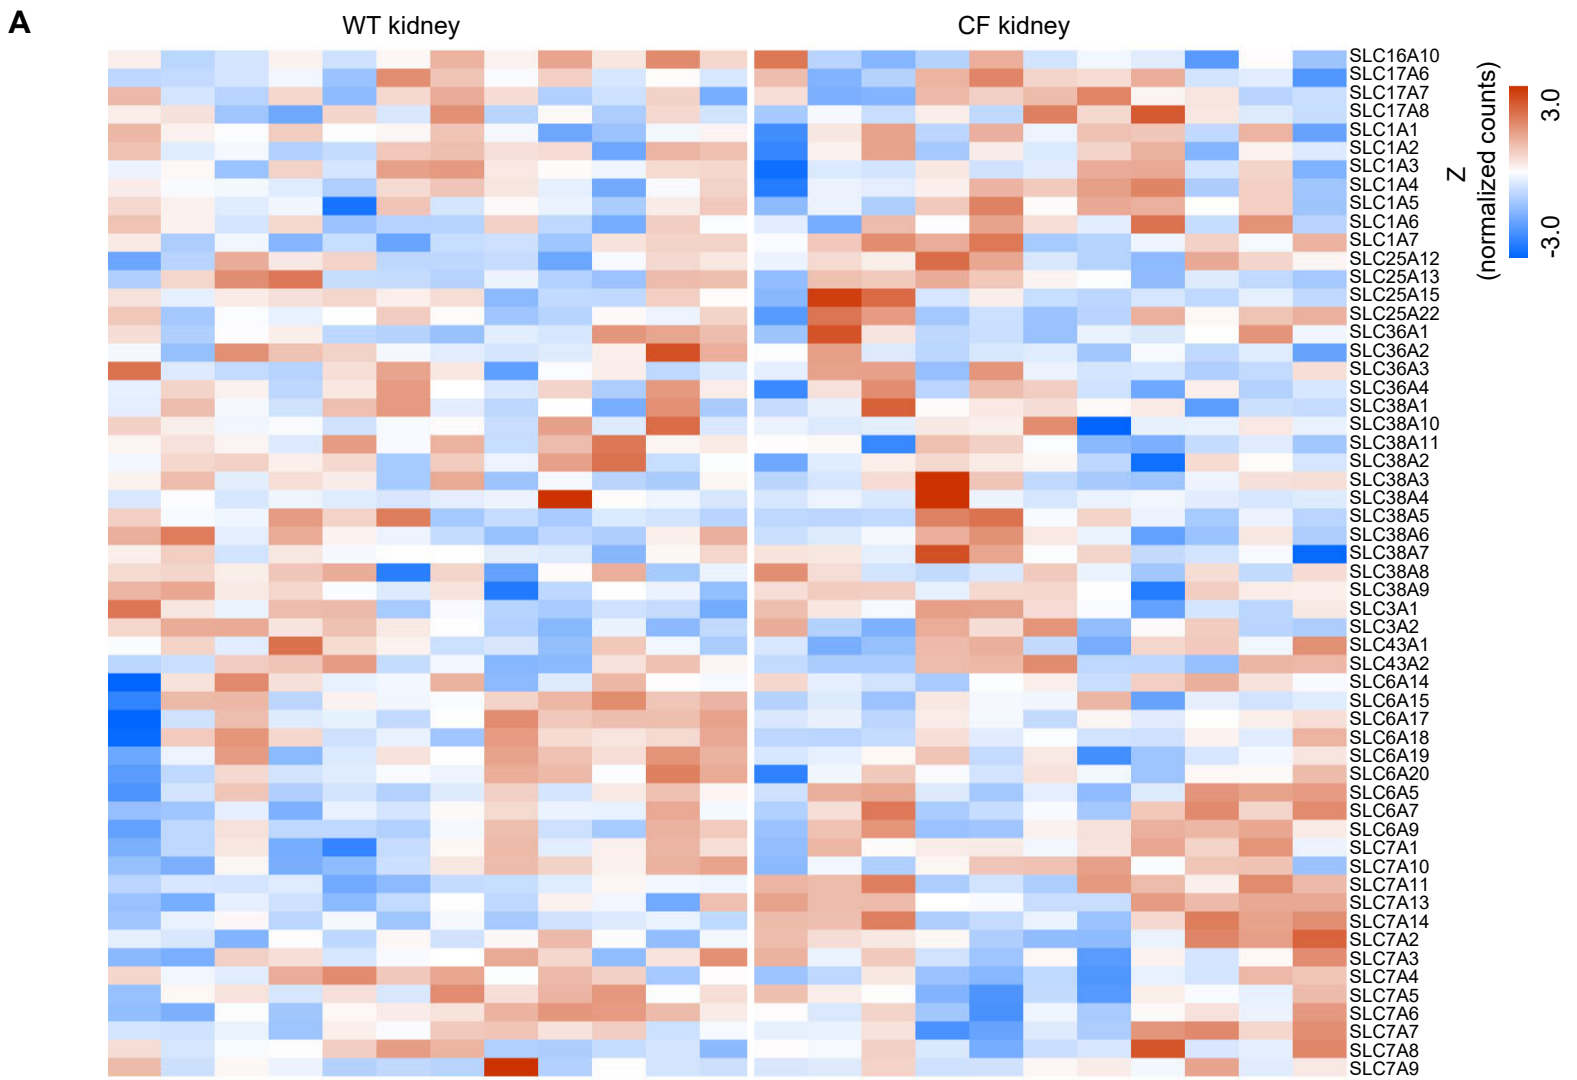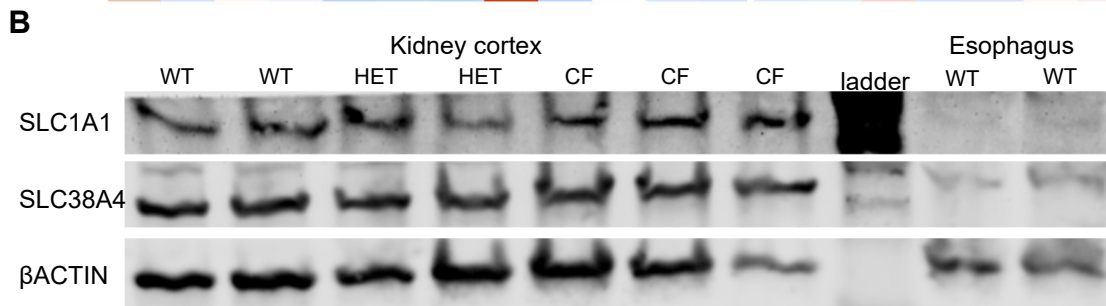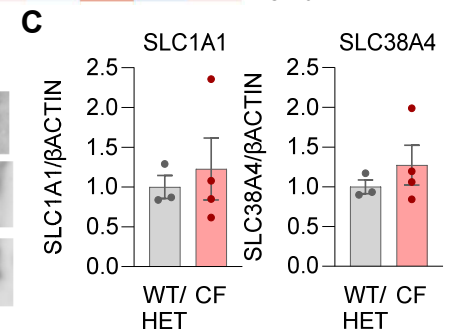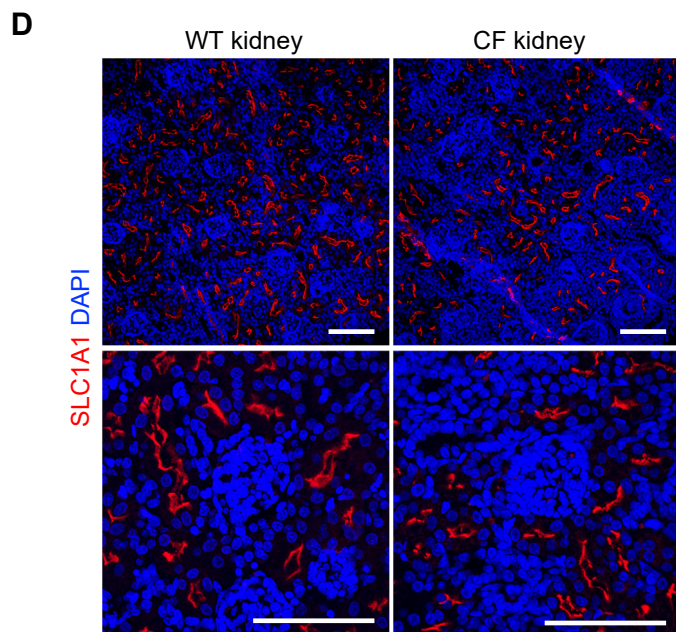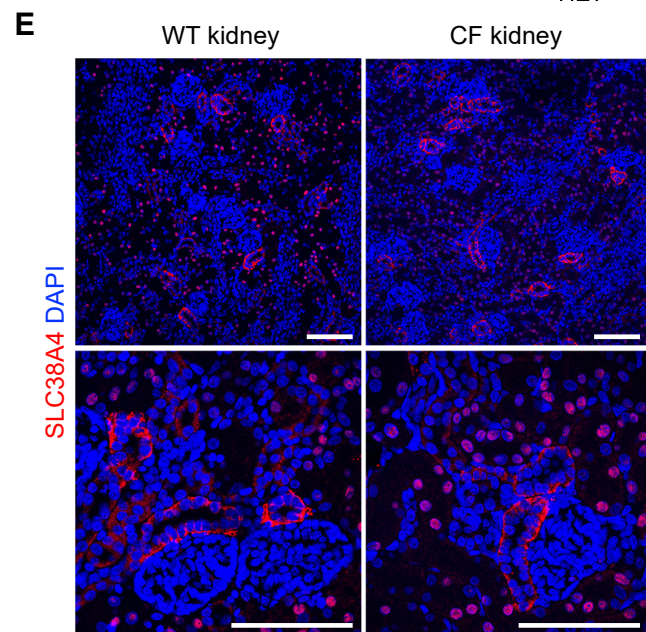

**Supplemental Figure 4. CF kidney shows similar mRNA and protein expression, and localization of amino acid transporters, related to Figure 6**

**(A)** Heatmap showing normalized counts of amino acid transporter mRNA in WT and CF kidneys. N=12 WT and 11 CF pigs. **(B-C)** Immunoblot analysis of SLC1A1 and SLC38A4 on WT/HET and CF kidney cortex tissues. Esophagus was used as a negative control. Quantitative data are presented on the right **(C)**. Bars show mean $\pm$ s.d. N=4 for WT/HET and 3 for CF. **(D-E)** Immunofluorescence staining of SLC1A1 **(D)** and SLC38A4 **(E)** on WT and CF kidney proximal epithelial tissues. Scale bars, 100  $\mu$ m.
