# Supplementary material for: Arteriovenous metabolomics in pigs reveals CFTR regulation of metabolism in multiple organs
Source: PubMed Central journal article supplement (PMC11213515; doi:10.1172/jci174500), 2024-05-14

Full unedited gel for Supplemental Figure 4B

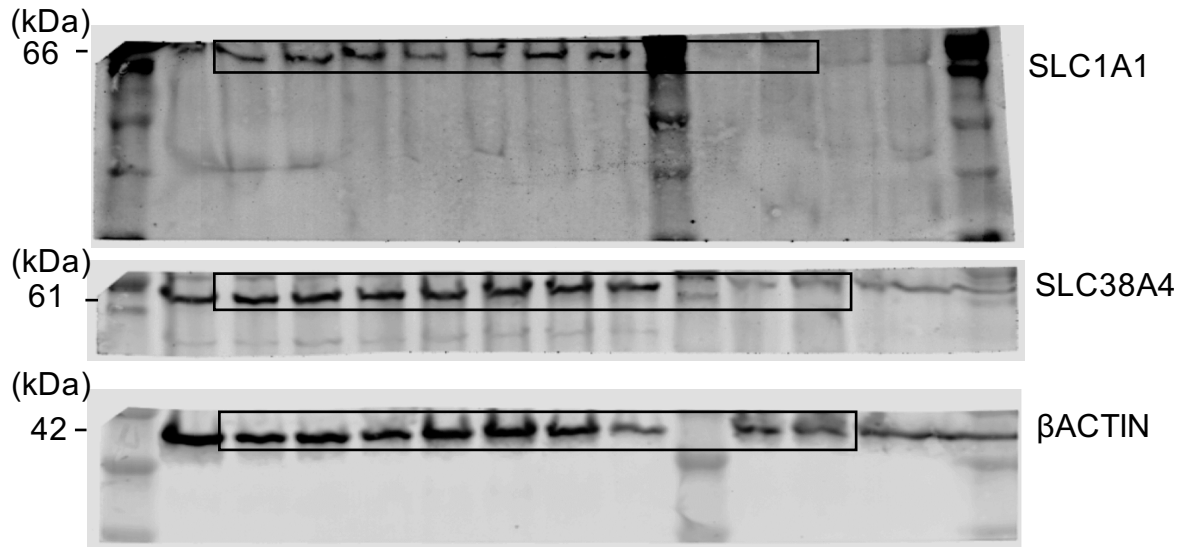

Supplement: jci-134-174500-s109.pdf [file jci-134-174500-s109.pdf]
